# Supplementary material for: Identification of Shaker Potassium Channel Family Members in Gossypium hirsutum L. and Characterization of GhKAT1aD
Source: MDPI journal article supplement (doi:10.3390/life13071461), 2023-06-28
Supplement: s1 [file s1]

Table S1 Primers for the characteristic of cotton Shaker K<sup>+</sup> channel family genes

| Primer              | Sequence (5'→3')       |
|---------------------|------------------------|
| Primers for qRT-PCR |                        |
| <i>GhActin9</i> -F  | GCCTTGGACTATGAGCAGGA   |
| <i>GhActin9</i> -R  | AAGAGATGGCTGGAAGAGGA   |
| <i>GhAKT1aD</i> -F  | CGTTCATCATTGGACACCG    |
| <i>GhAKT1aD</i> -R  | TGGACGGGATTGGCTACAT    |
| <i>GhAKT1bD</i> -F  | GTTGCGTTCGTATGGCTTGTT  |
| <i>GhAKT1bD</i> -R  | CCAGGATCACGGTATCTCGC   |
| <i>GhAKT1cD</i> -F  | GAGAGAAAGCAGCCATTACAGC |
| <i>GhAKT1cD</i> -R  | CTCCAATGGTGAAACCCAAG   |
| <i>GhAKT1dD</i> -F  | GTTTCGTGGCGTTTCTAATGAC |
| <i>GhAKT1dD</i> -R  | TTGCCTCTCCAACAACCTG    |
| <i>GhKAT1aD</i> -F  | ATGTGTAGCCTTGAGTATTC   |
| <i>GhKAT1aD</i> -R  | ACAGATCCAGGCAGAGTAAA   |
| <i>GhKAT1bD</i> -F  | ATGTGATTACAGGTTACG     |
| <i>GhKAT1bD</i> -R  | TTCCTCCCATTTGCTCCTTGC  |
| <i>GhAKT2aD</i> -F  | TCCAAGGGTGGGCATCTAT    |
| <i>GhAKT2aD</i> -R  | CTGCTTCATCTGTTACAATGGC |
| <i>GhAKT2bD</i> -F  | GGCGTTTCTCAGTTCATCG    |
| <i>GhAKT2bD</i> -R  | CCCACTCTGCTATTGCCAGT   |
| <i>GhKAT3aD</i> -F  | GCCCAACACCTATTCTGGAA   |
| <i>GhKAT3aD</i> -R  | ACTGCTCCGTCCCATTCTT    |
| <i>GhKAT3bD</i> -F  | GCCACAGCCATACACAGTTAGG |
| <i>GhKAT3bD</i> -R  | TCATTGTTTCCTTCCTCGGG   |
| <i>GhSKORaD</i> -F  | CAATGGTGTGGATAGATTACGG |
| <i>GhSKORaD</i> -R  | TCTCTGAAGTCCTCAACCTCG  |
| <i>GhGORKaD</i> -F  | CCGAACACCACTTCATGTTG   |
| <i>GhGORKaD</i> -R  | TTCTCCCCTCGAATTGTTG    |

Primers for VIGS vectors

---

|                            |                                |
|----------------------------|--------------------------------|
| PYL156- <i>GhKAT1aD</i> -F | CGGGGTACCGTGGAAC TTCACTGATGAAC |
|----------------------------|--------------------------------|

|                            |                              |
|----------------------------|------------------------------|
| PYL156- <i>GhKAT1aD</i> -R | TCCCCCGGGAACACTTTTGGTGTCTTCC |
|----------------------------|------------------------------|

Primers for yeast complementation vectors

|                              |                                                |
|------------------------------|------------------------------------------------|
| p416-GPD- <i>GhKAT1aD</i> -F | CTTAGTTTCGACGGATTCTAGAATGTGTAGCCTTGAGTATT<br>C |
|------------------------------|------------------------------------------------|

|                              |                                               |
|------------------------------|-----------------------------------------------|
| p416-GPD- <i>GhKAT1aD</i> -R | ATATCGAATTCCTGCAGCCCGGGGTCGCATTGAAACCTA<br>CA |
|------------------------------|-----------------------------------------------|

Primers for subcellular localization protein expression vector

|                          |                                |
|--------------------------|--------------------------------|
| pHBT- <i>GhKAT1aD</i> -F | CTAGTCTAGAATGTGTAGCCTTGAGTATTC |
|--------------------------|--------------------------------|

|                          |                               |
|--------------------------|-------------------------------|
| pHBT- <i>GhKAT1aD</i> -R | TCCCCCGGGGTCGCATTGAAACCTACATT |
|--------------------------|-------------------------------|

---
